# Supplementary material for: Machine Learning–Based Screening of Healthy Meals From Image Analysis: System Development and Pilot Study
Source: JMIR Form Res. 2020 Oct 26;4(10):e18507. doi: 10.2196/18507 (PMC7652690; doi:10.2196/18507)
Supplement: Multimedia Appendix 1 [file formative_v4i10e18507_app1.docx]

| Algorithm 1 |
| --- |
| 1. Procedure Ranking 2. Split S into half subset and . 3. for do 4. if (numbers of samples of ) then 5. Merge. 6. else 7. Ranking 8. procedure Merge 9. if (numbers of total samples) then 10. Split into half subsets and . 11. Merge 12. Merge 13. else 14. Select a sample around the middle of sorted list as a pivot. 15. for to do 16. Add to . 17. Annotate rank manually on GUI and sort samples of . 18. Split into and by lower or higher than . 19. Store and in and , each. 20. Merge 21. Merge 22. Concat and as 23. return |
